# Supplementary material
Source: publisher site journal article supplement (https://static.cambridge.org/content/id/urn:cambridge.org:id:article:S0272263120000108/resource/name/S0272263120000108supp001.docx)
Supplement: Supplementary file 1 [file S0272263120000108supp001.docx]

**Preliminary Analyses**

Table 1. Descriptive Statistics for Participants’ Performance on the Oxford Placement Test

|  | Listening Section | | |  | Grammar Section | | |
| --- | --- | --- | --- | --- | --- | --- | --- |
|  | *M* | *SD* | 95% CI |  | *M* | *SD* | 95% CI |
| No Captions | 89.04 | 4.72 | [87.05, 91.04] |  | 87.08 | 4.68 | [85.11, 89.06] |
| Non-enhanced Captions | 89.38 | 6.14 | [86.78, 91.97] |  | 89.00 | 4.75 | [86.99, 91.01] |
| Enhanced Captions | 91.17 | 4.06 | [89.45, 92.88] |  | 88.63 | 4.68 | [87.13, 89.34] |

Table 2. Results for the Logistic Mixed-effects Model Examining Performance on the Three Pretests – Present Perfect

|  | Fixed effects | | |  |  | Random effects | | | |
| --- | --- | --- | --- | --- | --- | --- | --- | --- | --- |
|  |  |  | |  |  | *by participant* | | *by item* | |
|  | Estimate | *SE* | *z* | *p* |  | *variance* | *SD* | *variance* | *SD* |
| Oral productive | | | | | | | | | |
| Intercept | −1.77 | .35 | −4.96 | <.001*** |  | .88 | .94 | .02 | .14 |
| Group2 | −.27 | .47 | −.58 | .560 |  |  |  |  |  |
| Group3 | −.10 | .46 | −.21 | .830 |  |  |  |  |  |
| Written productive | | | | | | | | | |
| Intercept | −2.36 | .50 | −4.68 | <.001*** |  | 2.06 | 1.44 | .07 | .26 |
| Group2 | 0.31 | .60 | .51 | .610 |  |  |  |  |  |
| Group3 | −.08 | .61 | −.13 | .900 |  |  |  |  |  |
| Fill-in-the-blank | | | | | | | | | |
| Intercept | −2.59 | .44 | −5.85 | <.001*** |  | .30 | .55 | .17 | .41 |
| Group2 | .62 | .46 | 1.35 | .180 |  |  |  |  |  |
| Group3 | .47 | .47 | 1.01 | .310 |  |  |  |  |  |

Table 3. Results for the Linear Mixed-effects Model Examining Performance on the Three Pretests – Past Simple

|  | Fixed effects | | |  |  |  | Random effects | | | | |
| --- | --- | --- | --- | --- | --- | --- | --- | --- | --- | --- | --- |
|  |  |  | |  |  |  | *by participant* | | *by item* | | |
|  | Estimate | *SE* | *t* | *P* | *R2m* | *R2c* | *variance* | *SD* | *variance* | *SD* | |
| Oral productive | | | | | | | | | | |
| Intercept | −.17 | .11 | −1.05 | .320 | <.01 | .20 | .09 | .30 | .02 | .15 | |
| Group2 | −.08 | .13 | −.60 | .550 |  |  |  |  |  |  | |
| Group3 | −.09 | .13 | −.70 | .480 |  |  |  |  |  |  | |
| Written productive | | | | | | | | | | |
| Intercept | −.13 | .20 | −.67 | .510 | .02 | .65 | .80 | .89 | .02 | .13 | |
| Group2 | −.13 | .27 | −.47 | .640 |  |  |  |  |  |  | |
| Group3 | −.42 | .27 | −1.54 | .130 |  |  |  |  |  |  | |
| Fill-in-the-blank | | | | | | | | | | |
| Intercept | 1.55 | .09 | 17.23 | <.001*** | <.01 | .12 | .02 | .15 | .01 | .11 | |
| Group2 | .11 | .12 | .90 | .410 |  |  |  |  |  |  | |
| Group3 | .01 | .14 | .06 | .950 |  |  |  |  |  |  | |

**Research Question 1**

Table 4. Results for the Logistic Mixed-effects Model Examining Performance on the Oral Productive Test – Present Perfect

|  | Fixed effects | | | |  | Random effects | | | |
| --- | --- | --- | --- | --- | --- | --- | --- | --- | --- |
|  |  |  | | |  | *by participant* | | *by item* | |
|  | Estimate | *SE* | *z* | *p* |  | *variance* | *SD* | *variance* | *SD* |
| Intercept | −1.92 | .37 | −5.15 | <.001*** |  | 1.51 | 1.23 | .01 | .11 |
| Time2 | .87 | .34 | 2.54 | <.01* |  |  | |  | |
| Time3 | .32 | .35 | .91 | .360 |  |  | |  | |
| Group2 | −.33 | .53 | -.62 | .540 |  |  | |  | |
| Group3 | −.04 | .52 | -.08 | .940 |  |  | |  | |
| Time2:Group2 | .74 | .49 | 1.50 | .130 |  |  | |  | |
| Time2:Group2 | .79 | .50 | 1.57 | .120 |  |  | |  | |
| Time2:Group3 | 2.03 | .49 | 4.11 | <.001*** |  |  | |  | |
| Time3:Group3 | 3.34 | .53 | 6.35 | <.001*** |  |  | |  | |

*** *p* < .001, ** *p* < .01, * *p* < .05

Table 5. Results for Post hoc Contrasts for No Captions Group and Unenhanced Captions Group on Oral Productive Test – Present Perfect

|  | Fixed effects | | | |  | Random effects | | | |
| --- | --- | --- | --- | --- | --- | --- | --- | --- | --- |
|  |  |  | | |  | *by participant* | | *by item* | |
|  | Estimate | *SE* | *z* | *p* |  | *variance* | *SD* | *variance* | *SD* |
| Pretest ~ Immediate posttest | | | | | | | | | |
| Intercept | −1.94 | .38 | −5.11 | <.001*** |  | 1.56 | 1.25 | <.01 | <.01 |
| Group | −.21 | .53 | −.40 | .690 |  |  | |  | |
| Time | .87 | .34 | 2.54 | <.01** |  |  | |  | |
| Group*Time | .66 | .49 | 1.36 | .170 |  |  | |  | |
| Pretest ~ Delayed posttest | | | | | | | | | |
| Intercept | −1.87 | .37 | −4.98 | <.001*** |  | 1.44 | 1.20 | <.01 | <.01 |
| Group | −.32 | .53 | −.61 | .540 |  |  | |  | |
| Time | .31 | .35 | .88 | .380 |  |  | |  | |
| Group*Time | .78 | .51 | 1.53 | .120 |  |  | |  | |

Table 6. Results for Post hoc Contrasts for No Captions Group and Enhanced Captions Group on Oral Productive Test – Present Perfect

|  | Fixed effects | | | |  | Random effects | | | |
| --- | --- | --- | --- | --- | --- | --- | --- | --- | --- |
|  |  |  | | |  | *by participant* | | *by item* | |
|  | Estimate | *SE* | *z* | *p* |  | *variance* | *SD* | *variance* | *SD* |
| Pretest ~ Immediate posttest | | | | | | | | | |
| Intercept | −1.85 | .35 | −5.22 | <.001*** |  | 1.08 | 1.25 | <.01 | <.01 |
| Group | −.02 | .48 | −.04 | <.01** |  |  | |  | |
| Time | .84 | .34 | 2.44 | .010 |  |  | |  | |
| Group*Time | 1.95 | .49 | 3.97 | <.001*** |  |  | |  | |
| Pretest ~ Delayed posttest | | | | | | | | | |
| Intercept | −1.76 | .33 | −5.31 | <.001*** |  | .86 | .93 | <.01 | <.01 |
| Group | −.09 | .45 | −.20 | .840 |  |  | |  | |
| Time | .30 | .34 | 86 | .390 |  |  | |  | |
| Group*Time | 3.17 | .52 | 6.07 | <.001*** |  |  | |  | |

Table 7. Results for Post hoc Contrasts for Unenhanced Captions Group and Enhanced Captions Group on Oral Productive Test – Present Perfect

|  | Fixed effects | | | |  | Random effects | | | |
| --- | --- | --- | --- | --- | --- | --- | --- | --- | --- |
|  |  |  | | |  | *by participant* | | *by item* | |
|  | Estimate | *SE* | *z* | *p* |  | *variance* | *SD* | *variance* | *SD* |
| Pretest ~ Immediate posttest | | | | | | | | | |
| Intercept | −2.00 | .34 | −5.94 | <.001*** |  | .76 | .87 | <.01 | <.01 |
| Group | .17 | .45 | .39 | .700 |  |  | |  | |
| Time | 1.43 | .34 | 4.19 | <.001*** |  |  | |  | |
| Group*Time | 1.27 | .48 | 2.64 | .008 |  |  | |  | |
| Pretest ~ Delayed posttest | | | | | | | | | |
| Intercept | −2.14 | .40 | −5.41 | <.001*** |  | 1.14 | 1.07 | .06 | .25 |
| Group | .22 | .50 | .44 | .660 |  |  | |  | |
| Time | 1.07 | .36 | 2.95 | <.01** |  |  | |  | |
| Group*Time | 2.52 | .53 | 4.72 | <.001*** |  |  | |  | |

Table 8. Results for the Logistic Mixed-effects Model Examining Performance on Written Productive Test – Present Perfect

|  | Fixed effects | | | |  | Random effects | | | |
| --- | --- | --- | --- | --- | --- | --- | --- | --- | --- |
|  |  |  | | |  | *by participant* | | *by item* | |
|  | Estimate | *SE* | *z* | *p* |  | *variance* | *SD* | *variance* | *SD* |
| Intercept | −2.21 | .43 | −5.13 | <.001*** |  | 2.11 | 1.45 | .03 | .19 |
| Time2 | −0.00 | .39 | .00 | 1.000 |  |  | |  | |
| Time3 | .07 | .39 | .19 | .850 |  |  | |  | |
| Group2 | .09 | .59 | .15 | .880 |  |  | |  | |
| Group3 | −.17 | .60 | −.28 | .780 |  |  | |  | |
| Time2:Group2 | 1.82 | .54 | 3.37 | <.001*** |  |  | |  | |
| Time2:Group2 | 1.59 | .54 | 2.96 | <.01** |  |  | |  | |
| Time2:Group3 | 4.17 | .59 | 7.05 | <.001*** |  |  | |  | |
| Time3:Group3 | 3.12 | .56 | 5.58 | <.001*** |  |  | |  | |

Table 9. Results for Post hoc Contrasts for No Captions Group and Unenhanced Captions Group on Written Productive Test – Present Perfect

|  | Fixed effects | | | |  | Random effects | | | |
| --- | --- | --- | --- | --- | --- | --- | --- | --- | --- |
|  |  |  | | |  | *by participant* | | *by item* | |
|  | Estimate | *SE* | *Z* | *p* |  | *variance* | *SD* | *variance* | *SD* |
| Pretest ~ Immediate posttest | | | | | | | | | |
| Intercept | −2.19 | .42 | −5.20 | <.001*** |  | 1.82 | 1.35 | .01 | .11 |
| Group | .21 | .56 | .37 | .710 |  |  | |  | |
| Time | −.00 | .39 | .00 | 1.000 |  |  | |  | |
| Group*Time | 1.69 | .53 | 3.17 | .002 |  |  | |  | |
| Pretest ~ Delayed posttest | | | | | | | | | |
| Intercept | −2.19 | .42 | −5.21 | <.001*** |  | 1.90 | 1.38 | <.01 | <.01 |
| Group | .15 | .57 | .27 | .790 |  |  | |  | |
| Time | .07 | .39 | .19 | .850 |  |  | |  | |
| Group*Time | 1.52 | .53 | 2.85 | .004 |  |  | |  | |

Table 10. Results for Post hoc Contrasts for No Captions Group and Enhanced Captions Group on Written Productive Test – Present Perfect

|  | Fixed effects | | | |  | Random effects | | | |
| --- | --- | --- | --- | --- | --- | --- | --- | --- | --- |
|  |  |  | | |  | *by participant* | | *by item* | |
|  | Estimate | *SE* | *z* | *p* |  | *variance* | *SD* | *variance* | *SD* |
| Pretest ~ Immediate posttest | | | | | | | | | |
| Intercept | −2.14 | .41 | −5.16 | <.001*** |  | 1.33 | 1.15 | .10 | .32 |
| Group | −.15 | .53 | −.27 | .700 |  |  | |  | |
| Time | .00 | .39 | .00 | 1.000 |  |  | |  | |
| Group*Time | 4.00 | .61 | 6.50 | <.001*** |  |  | |  | |
| Pretest ~ Delayed posttest | | | | | | | | | |
| Intercept | −2.06 | .37 | −5.60 | <.001*** |  | 1.09 | 1.04 | .01 | .08 |
| Group | −.12 | .50 | −.26 | .800 |  |  | |  | |
| Time | .07 | .38 | .19 | .850 |  |  | |  | |
| Group*Time | 2.88 | .55 | 5.25 | <.001*** |  |  | |  | |

Table 11. Results for Post hoc Contrasts for Unenhanced Captions Group and Enhanced Captions Group on Written Productive Test – Present Perfect

|  | Fixed effects | | | |  | Random effects | | | |
| --- | --- | --- | --- | --- | --- | --- | --- | --- | --- |
|  |  |  | | |  | *by participant* | | *by item* | |
|  | Estimate | *SE* | *z* | *p* |  | *variance* | *SD* | *variance* | *SD* |
| Pretest ~ Immediate posttest | | | | | | | | | |
| Intercept | −2.12 | .48 | −4.40 | <.001*** |  | 2.54 | 1.59 | .11 | .33 |
| Group | −.37 | .64 | −.59 | .560 |  |  | |  | |
| Time | 1.79 | .38 | 4.76 | <.001*** |  |  | |  | |
| Group*Time | 2.57 | .60 | 4.27 | <.001*** |  |  | |  | |
| Pretest ~ Delayed posttest | | | | | | | | | |
| Intercept | −2.16 | .49 | −4.45 | <.001*** |  | 2.50 | 1.58 | .12 | .35 |
| Group | −.28 | .63 | −.45 | .650 |  |  | |  | |
| Time | 1.69 | .38 | 4.42 | <.001*** |  |  | |  | |
| Group*Time | 1.61 | .55 | 2.90 | .004 |  |  | |  | |

Table 12. Results for the Logistic Mixed-effects Model Examining Performance on Fill-in-the-blank Test – Present Perfect

|  | Fixed effects | | | |  | Random effects | | | |
| --- | --- | --- | --- | --- | --- | --- | --- | --- | --- |
|  |  |  | | |  | *by participant* | | *by item* | |
|  | Estimate | *SE* | *z* | *p* |  | *variance* | *SD* | *variance* | *SD* |
| Intercept | −3.03 | .49 | −6.22 | <.001*** |  | 1.15 | 1.07 | .17 | .42 |
| Time2 | .43 | .47 | .09 | .360 |  |  | |  | |
| Time3 | .69 | .45 | 1.53 | .130 |  |  | |  | |
| Group2 | .83 | .57 | 1.46 | .140 |  |  | |  | |
| Group3 | .73 | .57 | 1.28 | .200 |  |  | |  | |
| Time2:Group2 | .65 | .59 | 1.10 | .270 |  |  | |  | |
| Time2:Group2 | .23 | .58 | .40 | .690 |  |  | |  | |
| Time2:Group3 | 2.61 | .60 | 4.36 | <.001*** |  |  | |  | |
| Time3:Group3 | 2.39 | .59 | 4.06 | <.001*** |  |  | |  | |

Table 13. Results for Post hoc Contrasts for No Captions Group and Unenhanced Captions Group on Fill-in-the-blank Test – Present Perfect

|  | Fixed effects | | | |  |  | Random effects | | | |
| --- | --- | --- | --- | --- | --- | --- | --- | --- | --- | --- |
|  |  |  | | |  |  | *by participant* | | *by item* | |
|  | Estimate | *SE* | *z* | *p* | *R2m* | *R2c* | *variance* | *SD* | *variance* | *SD* |
| Pretest ~ Immediate posttest | | | | | | | | | | |
| Intercept | −2.89 | .51 | −5.63 | <.001*** | .09 | .33 | .84 | .92 | .30 | .55 |
| Group | .76 | .54 | 1.42 | .160 |  |  |  | |  | |
| Time | .42 | .46 | .91 | .360 |  |  |  | |  | |
| Group*Time | .64 | .58 | 1.09 | .280 |  |  |  | |  | |
| Pretest ~ Delayed posttest | | | | | | | | | | |
| Intercept | −3.18 | .57 | −5.55 | <.001*** | .07 | .42 | 1.71 | 1.31 | .21 | .46 |
| Group | .86 | .63 | 1.36 | .170 |  |  |  | |  | |
| Time | .71 | .46 | 1.55 | .120 |  |  |  | |  | |
| Group*Time | .25 | .59 | .42 | .670 |  |  |  | |  | |

Table 14. Results for Post hoc Contrasts for No Captions Group and Enhanced Captions Group on Fill-in-the-blank Test – Present Perfect

|  | Fixed effects | | | |  |  | Random effects | | | |
| --- | --- | --- | --- | --- | --- | --- | --- | --- | --- | --- |
|  |  |  | | |  |  | *by participant* | | *by item* | |
|  | Estimate | *SE* | *Z* | *p* | *R2m* | *R2c* | *variance* | *SD* | *variance* | *SD* |
| Pretest ~ Immediate posttest | | | | | | | | | | |
| Intercept | −2.80 | .45 | −6.19 | <.001*** | .32 | .47 | .86 | .92 | .06 | .24 |
| Group | .58 | .54 | 1.08 | .280 |  |  |  | |  | |
| Time | .41 | .45 | .90 | .370 |  |  |  | |  | |
| Group*Time | 2.53 | .59 | 4.27 | <.001*** |  |  |  | |  | |
| Pretest ~ Delayed posttest | | | | | | | | | | |
| Intercept | −3.05 | .55 | −5.52 | <.001*** | .32 | .54 | 1.19 | 1.09 | .36 | .60 |
| Group | .66 | .58 | 1.14 | .250 |  |  |  | |  | |
| Time | .70 | .46 | 1.53 | .130 |  |  |  | |  | |
| Group*Time | 2.52 | .61 | 4.15 | <.001*** |  |  |  | |  | |

Table 15. Results for Post hoc Contrasts for Unenhanced Captions Group and

Enhanced Captions Group on Fill-in-the-blank Test – Present Perfect

|  | Fixed effects | | | |  | Random effects | | | | | |
| --- | --- | --- | --- | --- | --- | --- | --- | --- | --- | --- | --- |
|  |  |  | | |  | *by participant* | | | *by item* | | |
|  | Estimate | *SE* | *z* | *P* |  | *variance* | | *SD* | *variance* | | *SD* |
| Pretest ~ Immediate posttest | | | | | | | | | | | |
| Intercept | −1.92 | .31 | −6.16 | <.001*** |  | .31 | | .56 | .04 | | .21 |
| Group | −.15 | .42 | −.37 | .710 |  |  | | |  | | |
| Time | .96 | .34 | 2.86 | <.01** |  |  | | |  | | |
| Group*Time | 1.78 | .49 | 3.65 | <.001*** |  |  |  | | |  | |
| Pretest ~ Delayed posttest | | | | | | | | | | | |
| Intercept | −2.10 | .40 | −5.30 | <.001*** |  | .68 | | .82 | .19 | | .44 |
| Group | −.13 | .47 | −.29 | .770 |  |  | | |  | | |
| Time | .89 | .36 | 2.51 | .01* |  |  | | |  | | |
| Group*Time | 2.12 | .52 | 4.09 | <.001*** |  |  | | |  | | |

Table 16. Results for the Linear Mixed-effects Model Examining Performance on Oral Productive / Written Productive / Fill-in-the-blank Tests – Past Simple

|  | Fixed effects | | | |  |  | Random effects | | | | | |
| --- | --- | --- | --- | --- | --- | --- | --- | --- | --- | --- | --- | --- |
|  |  |  | | |  |  | *by participant* | | | *by item* | | |
|  | Estimate | *SE* | *t* | *p* | *R2m* | *R2c* | *variance* | | *SD* | *variance* | | *SD* |
| Oral Production Test | | | | | | | | | | | | |
| Intercept | −.12 | .09 | −1.25 | .220 | <.01 | .08 | .09 | | .30 | <.01 | | .06 |
| Group2 | −.08 | .12 | −.64 | .520 |  |  |  | | |  | | |
| Group3 | −.09 | .13 | −.71 | .480 |  |  |  | | |  | | |
| Time2 | .01 | .12 | .10 | .920 |  |  |  | | |  | | |
| Time3 | −.10 | .10 | −1.05 | .290 |  |  |  | | |  | | |
| Time2:Group2 | .09 | .17 | .52 | .600 |  |  |  | | |  | | |
| Time2:Group2 | .02 | .17 | .15 | .880 |  |  |  | | |  | | |
| Time2:Group3 | .17 | .14 | 1.23 | .220 |  |  |  | | |  | | |
| Time3:Group3 | .21 | .14 | 1.51 | .130 |  |  |  | | |  | | |
| Written Production Test | | | | |  |  |  | | |  | | |
| Intercept | −.13 | .19 | −.68 | .500 | .02 | .41 | .76 | | .87 | .01 | | .09 |
| Group2 | −.13 | .28 | −.46 | .640 |  |  |  | | |  | | |
| Group3 | −.42 | .27 | −1.54 | .130 |  |  |  | | |  | | |
| Time2 | .00 | .20 | .02 | .990 |  |  |  | | |  | | |
| Time3 | −.23 | .20 | −1.14 | .260 |  |  |  | | |  | | |
| Time2:Group2 | .13 | .28 | .45 | .650 |  |  |  | | |  | | |
| Time2:Group2 | .33 | .28 | 1.17 | .240 |  |  |  | | |  | | |
| Time2:Group3 | .22 | .29 | .78 | .440 |  |  |  | | |  | | |
| Time3:Group3 | .30 | .29 | 1.04 | .300 |  |  |  | | |  | | |
| Fill-in-the-blank Test | | |  |  |  |  |  | | |  | | |
| Intercept | 1.55 | .08 | 18.88 | <.001*** | <.01 | .08 | <.01 | <.01 | | .01 | .11 | |
| Group2 | .11 | .09 | 1.15 | .250 |  |  |  | | |  | | |
| Group3 | .01 | .10 | .08 | .940 |  |  |  | | |  | | |
| Time2 | .08 | .09 | .87 | .390 |  |  |  | | |  | | |
| Time3 | .07 | .09 | .77 | .440 |  |  |  | | |  | | |
| Time2:Group2 | −.02 | .13 | −.18 | .850 |  |  |  | | |  | | |
| Time2:Group2 | −.02 | .13 | −.12 | .900 |  |  |  | | |  | | |
| Time2:Group3 | −.08 | .14 | −.61 | .540 |  |  |  | | |  | | |
| Time3:Group3 | .07 | .14 | .48 | .630 |  |  |  | | |  | | |

**Research Question 2**

Table 17. Results for the Linear Mixed-effects Models Examining Attention Allocated to Target Linguistic Construction - Present Perfect

|  | Fixed effects | | | |  |  | Random effects | | | |
| --- | --- | --- | --- | --- | --- | --- | --- | --- | --- | --- |
|  |  |  | | |  |  | *by participant* | | *by item* | |
|  | Estimate | *SE* | *t* | *P* | *R2m* | *R2c* | *variance* | *SD* | *variance* | *SD* |
| First pass reading | | | | | | | | | | |
| Intercept | 5.03 | .04 | 116.99 | <.001*** | .01 | .21 | .03 | .18 | <.01 | <.01 |
| Group | .08 | .06 | 1.26 | .210 |  |  |  | |  | |
| Second pass reading | | | | | | | | | | |
| Intercept | 5.00 | .07 | 73.35 | <.001*** | .16 | .43 | .06 | .24 | .03 | .16 |
| Group | .49 | .08 | 6.10 | <.001*** |  |  |  | |  | |
| Number of visits | | | | | | | | | | |
| Intercept | −.50 | .23 | −2.16 | .030* | .09 | .41 | .92 | .96 | .29 | .54 |
| Group | 1.09 | .30 | 3.58 | <.001*** |  |  |  | |  | |

Table 18. Results for the Logistic Mixed-effects Models Examining Attention Allocated to Target Linguistic Construction - Present Perfect

|  | Fixed effects | | | |  | Random effects | | | |
| --- | --- | --- | --- | --- | --- | --- | --- | --- | --- |
|  |  |  | | |  | *by participant* | | *by item* | |
|  | Estimate | *SE* | *z* | *p* |  | *variance* | *SD* | *variance* | *SD* |
| Skipping rate | | | | | | | | | |
| Intercept | −1.71 | .41 | −4.20 | <.001*** |  | 3.02 | 1.74 | .34 | .58 |
| Group | −2.20 | .61 | −3.61 | <.001*** |  |  | |  | |

Table 19. Results for the Linear Mixed-effects Models Examining Attention Allocated to Target Linguistic Construction – Past Simple

|  | | Fixed effects | | | |  |  | | Random effects | | | | |
| --- | --- | --- | --- | --- | --- | --- | --- | --- | --- | --- | --- | --- | --- |
|  | |  |  | | |  |  | | *by participant* | | | *by item* | |
|  | | Estimate | *SE* | *t* | *p* | *R2m* | *R2c* | | *variance* | | *SD* | *variance* | *SD* |
| First pass reading | | | | | | | | | | | | | |
| Intercept | | 5.42 | .12 | 45.83 | <.001*** | .03 | .59 | | .21 | | .46 | .09 | .31 |
| Group | | .27 | .14 | 1.92 | .060 |  |  | |  | |  |  | |
| Second pass reading | | | | | | | | | | | | | |
| Intercept | | 5.17 | .07 | 68.18 | <.001*** | .02 | .35 | | .08 | | .28 | .02 | .14 |
| Group | | .26 | .10 | 2.65 | .010* |  |  | |  | | |  | |
| Number of visits | | | | | | | | | | | | | |
| Intercept | −.41 | | .34 | −1.22 | .230 | .03 | .45 | 2.43 | | 1.56 | | .17 | .42 |
| Group | .84 | | .46 | 1.81 | .080 |  |  |  | | | |  | |

Table 20. Results for the Logistic Mixed-effects Models Examining Attention Allocated to Target Linguistic Construction – Past Simple

|  | Fixed effects | | | |  | Random effects | | | |
| --- | --- | --- | --- | --- | --- | --- | --- | --- | --- |
|  |  |  | | |  | *by participant* | | *by item* | |
|  | Estimate | *SE* | *z* | *p* |  | *variance* | *SD* | *variance* | *SD* |
| Skipping rate | | | | | | | | | |
| Intercept | −.98 | .42 | −2.30 | .010* |  | 3.66 | 1.91 | .27 | .52 |
| Group | −1.54 | .61 | −2.54 | .010* |  |  | |  | |
